# Supplementary material for: DNA hydrogels for bone regeneration
Source: PubMed Central journal article supplement — Proc Natl Acad Sci U S A. 2023 Apr 18;120(17):e2220565120. doi: 10.1073/pnas.2220565120 (PMC10151614; doi:10.1073/pnas.2220565120), 2023-04-18
Supplement: pnas.2220565120.sapp.pdf [file pnas.2220565120.sapp.pdf]

## **SUPPLEMENTARY INFORMATION**

### **DNA hydrogels for bone regeneration**

Dimitra Athanasiadou<sup>1</sup>, Nadeen Meshry<sup>1</sup>, Naara G. Monteiro<sup>2</sup>, Ana C. Ervolino-Silva<sup>2</sup>, Ryan Lee Chan<sup>3</sup>, Christopher A. McCulloch<sup>1</sup>, Roberta Okamoto<sup>2</sup>, Karina M. M. Carneiro<sup>1,3</sup>

<sup>1</sup>Faculty of Dentistry, University of Toronto, Toronto, Canada

<sup>2</sup>Department of Basic Sciences, São Paulo State University - UNESP School of Dentistry at Araçatuba, Araçatuba, SP, Brazil

<sup>3</sup>Institute of Biomedical Engineering, University of Toronto, Toronto, Canada

**Supplementary Table 1:** Complementary strands for DNA hydrogel synthesis.

| Strand | Sequence                                                                       |
|--------|--------------------------------------------------------------------------------|
| Y1     | 5'-CGA TTG ACT CTC CAC GCT GTC CTA ACC ATG ACC GTC GAA GCG ATT<br>GAC TCT C-3' |
| Y2     | 5'-CGA TTG ACT CTC CTT CGA CGG TCA TGT ACT AGA TCA GAG GCG ATT<br>GAC TCT C-3' |
| Y3     | 5'-CGA TTG ACT CTC CCT CTG ATC TAG TAG TTA GGA CAG CGT GCG ATT<br>GAC TCT C-3' |
| L1     | 5'-GAG AGT CAA TCG CGT CGT AGC AGT GTC AGG TAA GAG AGT CAA TC-3'               |
| L1'    | 5'-TTA CCT GAC ACT GCT ACG ACG-3'                                              |

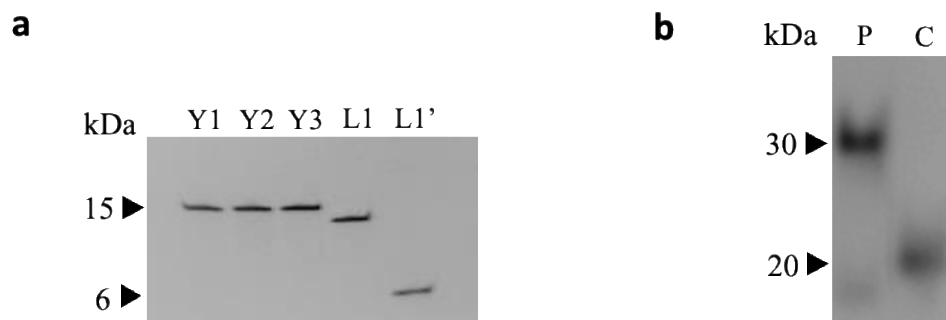

**Supplementary Fig. S1:** **a** Denaturing and **b** native PAGE experiments characterizing the DNA constructs that make the DNA hydrogel: three (Y1, Y2 and Y3) and two (L and L1') DNA strands assemble into prepolymer (P) and crosslinker (C) DNA constructs, respectively.

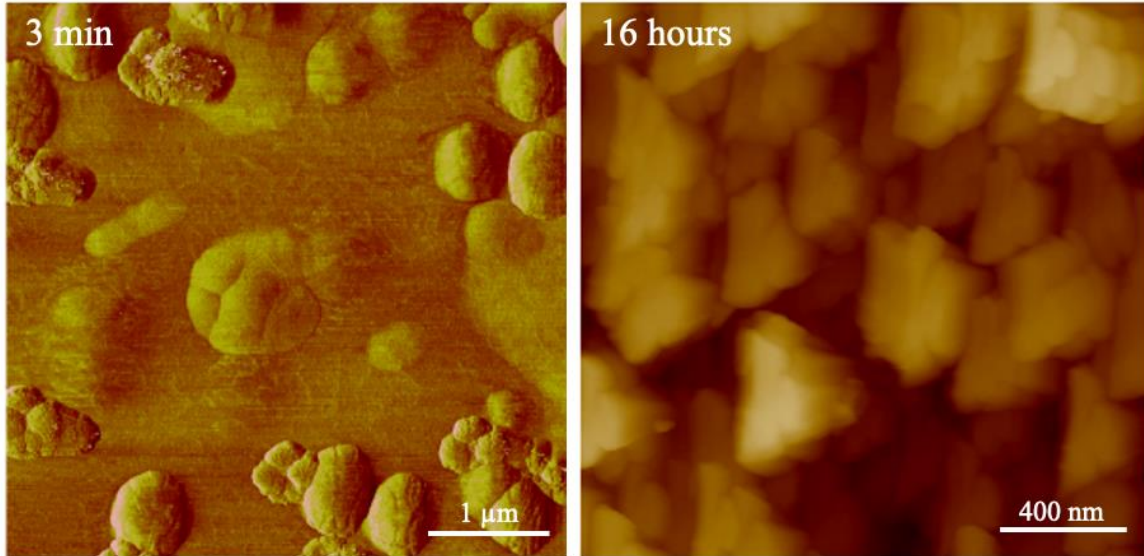

**Supplementary Fig. S2:** Calcium phosphate formation of DNA hydrogel after 3 minutes (left) and 16 hours (right) of mineralization.

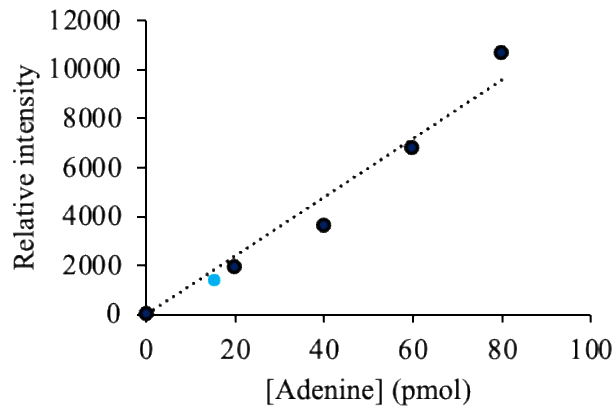

**Supplementary Fig. S3.** Adenine quantification in degraded DNA hydrogel after 7-day incubation in cell culture medium containing 10% FBS (blue) in comparison to a standard curve (black).

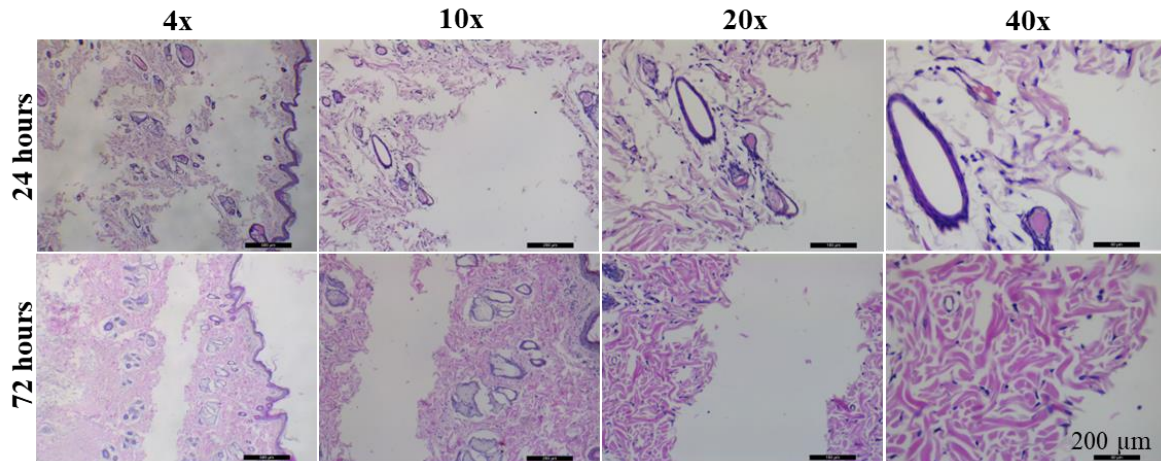

**Supplementary Fig. S4.** Inflammation experiment by implantation in the dorsal subcutaneous tissue of rats after 24- and 72-hours post-surgery.

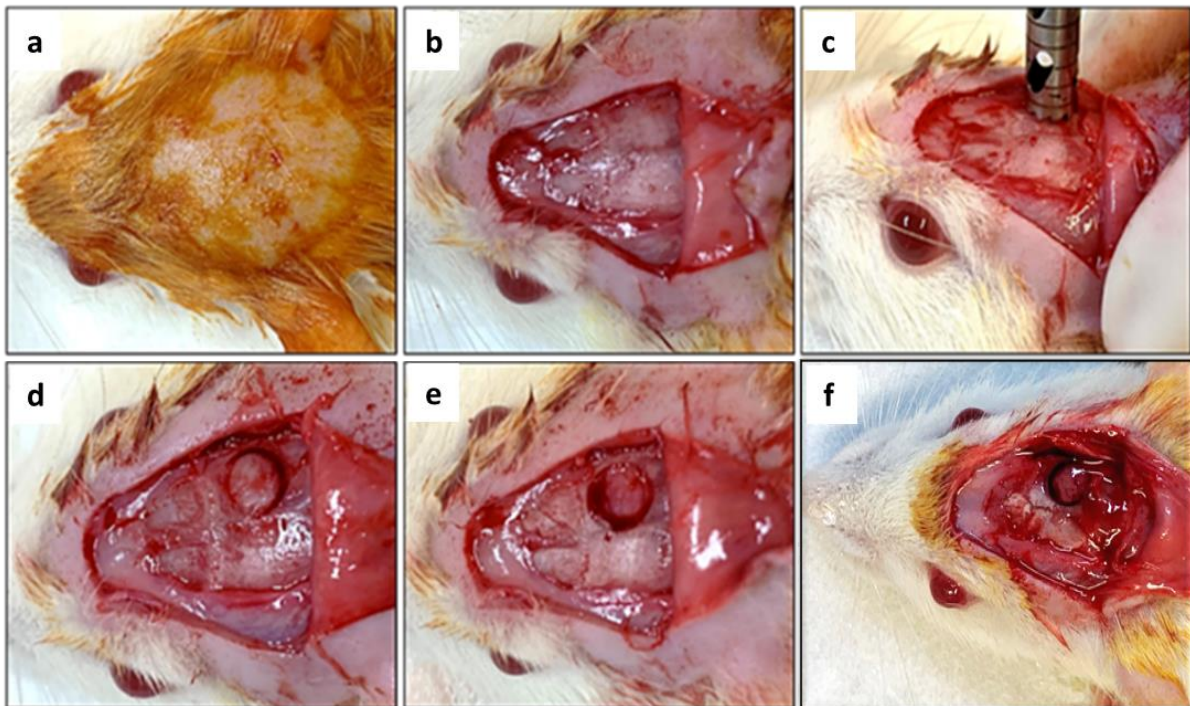

**Supplementary Fig. S5.** Surgical procedure for creating a critical defect in calvaria. **a** Trichotomy and antisepsis of the operative area. **b** U-shaped incision. **c** 5 mm diameter inner drill



bit positioning for defect creation. **d** Osteotomy in right parietal bone. **e** Parietal bone remotion from inside the defect. **f** DNA hydrogel.

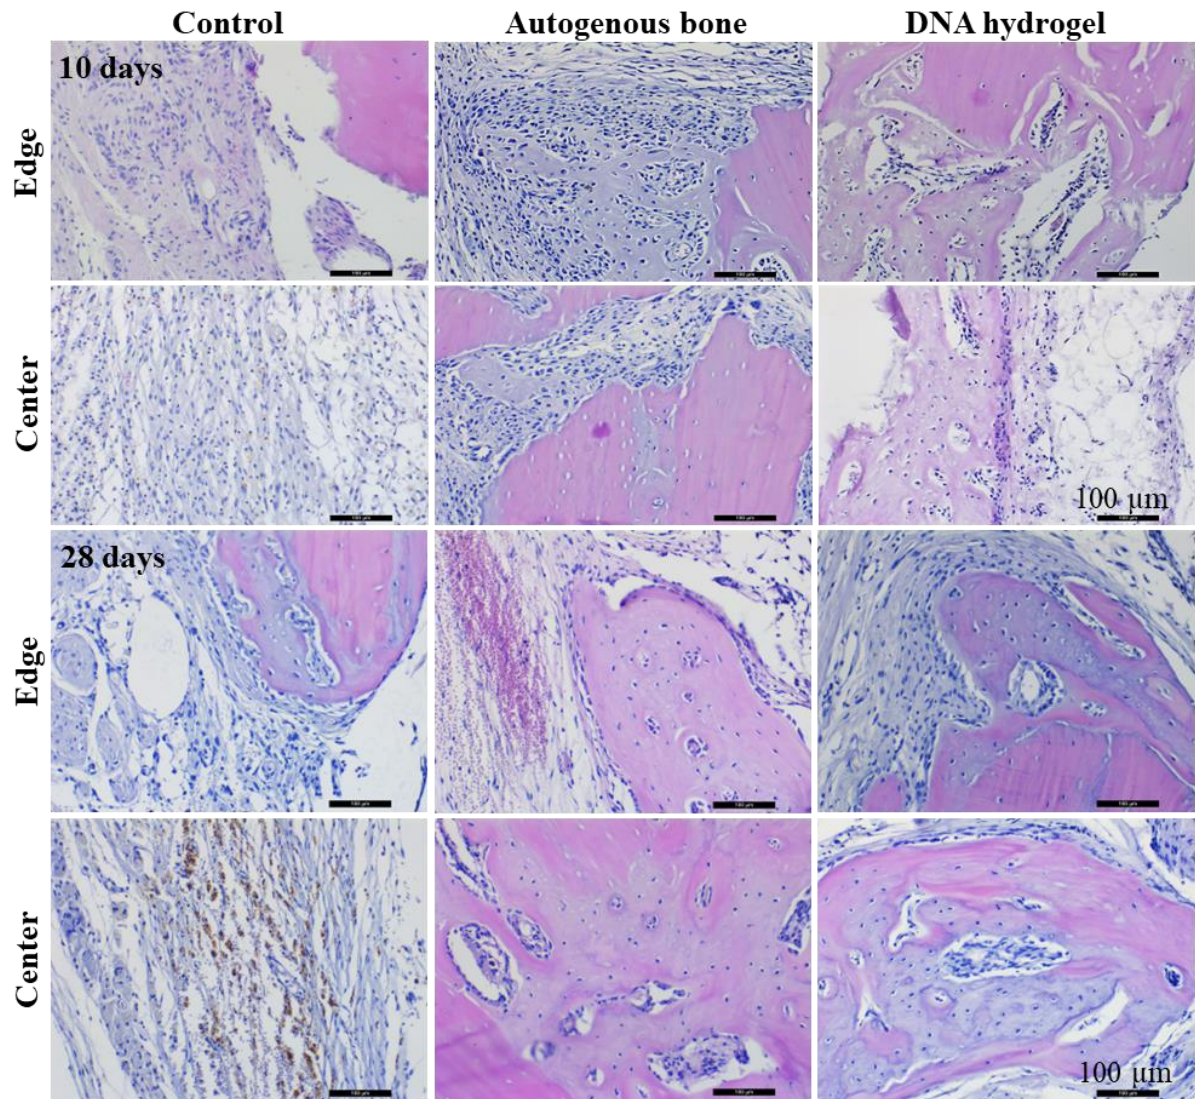

**Supplementary Fig. S6.** Histological analysis of the studied groups from the edge and the center of the rat calvarial defect at 10- and 28-days post-surgery.

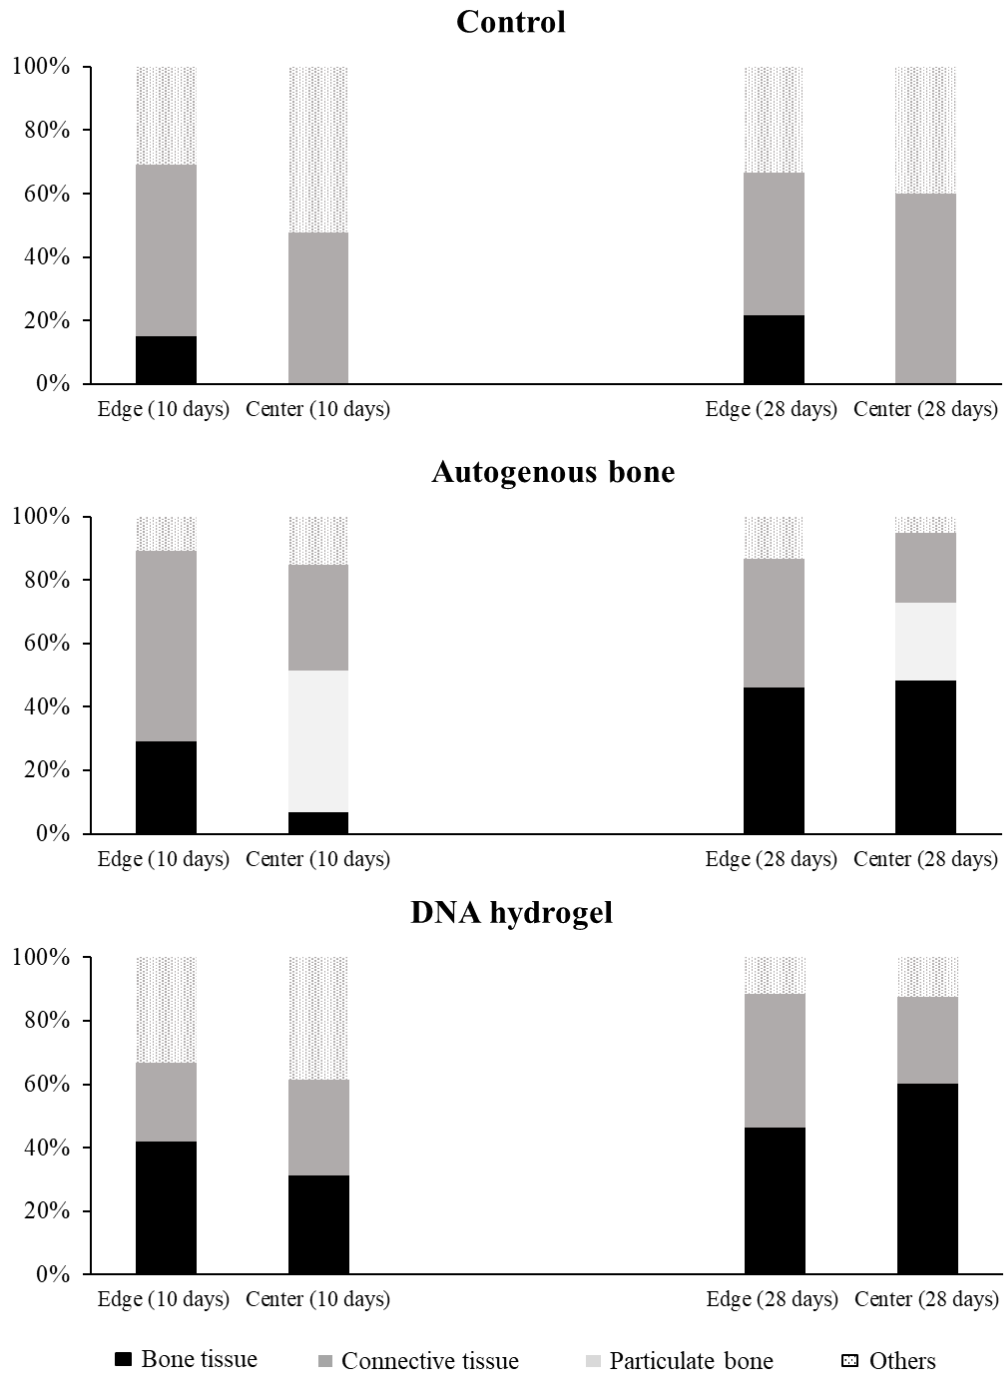

**Supplementary Fig. S7.** Quantitative analysis of the formed tissue among the studied groups.

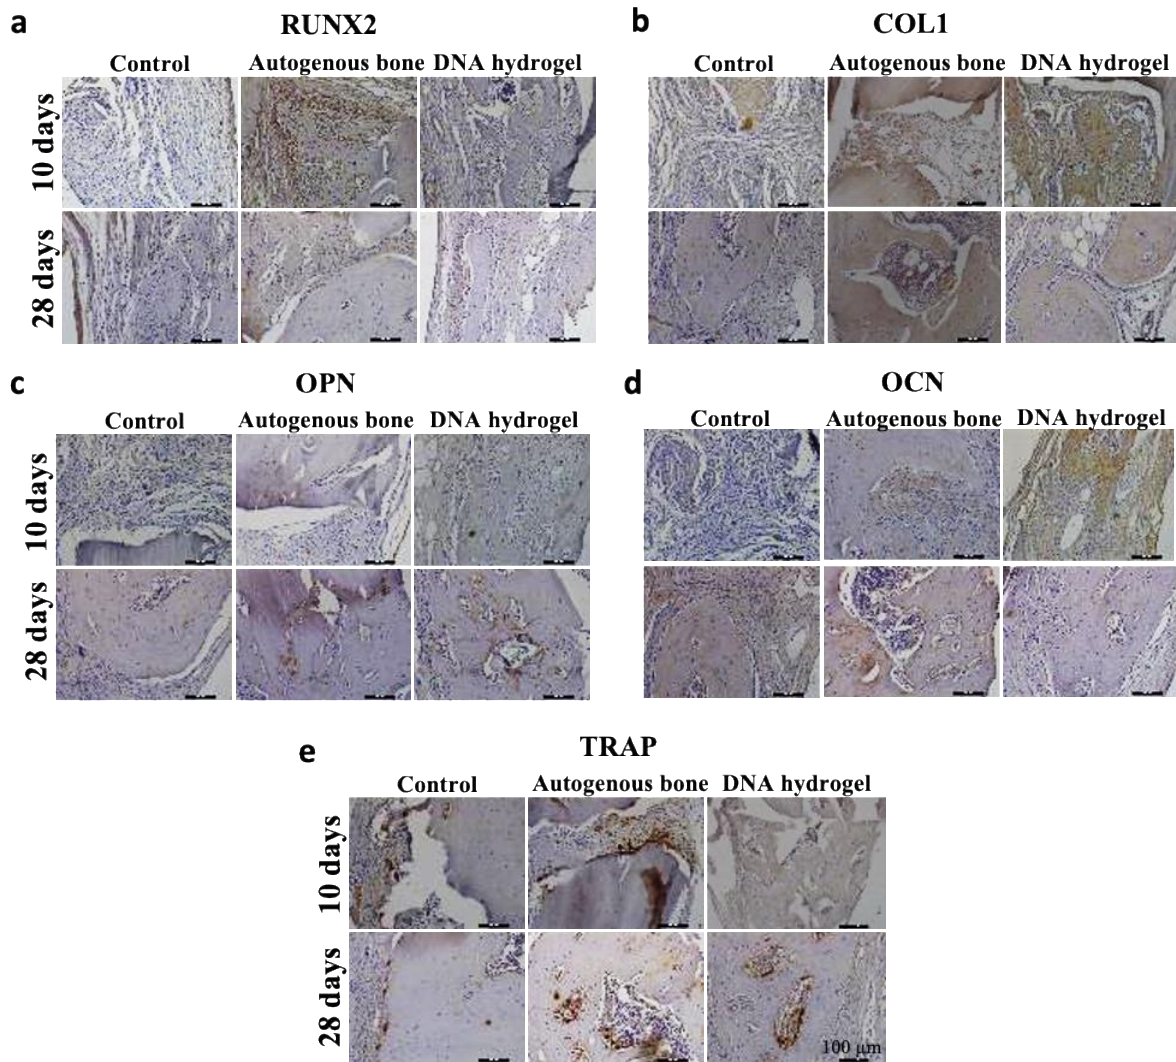

**Fig. S8: Immunolabeling analysis during DNA hydrogel calvaria healing.** Immunohistochemical detection of osteogenic differentiation markers **a** Runt-related transcription factor 2 (RUNX2), **b** Collagen type I (Col), **c** Osteopontin (OPN), **d** Osteocalcin (OCN) and **e** tartrate-resistant acid phosphatase (TRAP) among the studied groups at 10- and 28-days post-surgery.
